# Supplementary material for: Mechanisms of the surface reaction and crystal growth of cerium oxide by supercritical hydrothermal treatment with carboxylic acids
Source: Royal Society of Chemistry journal article supplement (doi:10.1039/d1ce00720c), 2021-01-01
Supplement: d1ce00720c1.pdf [file d1ce00720c1.pdf]

Table S1. Conditions of the hydrothermal treatment

| Molality in vessel (mol/L) |               | Water density<br>(kg/L) | Molality in water (mol/kg) |               | Temperature<br>(°C) | Water Pressure<br>(MPa) | Treatment<br>time (min) |
|----------------------------|---------------|-------------------------|----------------------------|---------------|---------------------|-------------------------|-------------------------|
| CeO <sub>2</sub>           | Decanoic acid |                         | CeO <sub>2</sub>           | Decanoic acid |                     |                         |                         |
| 0.05                       | 0.000         | 0.50                    | 0.10                       | 0             | 400                 | 38                      | 10, 60                  |
| 0.05                       | 0.0025        | 0.50                    | 0.10                       | 0.005         | 400                 | 38                      | 10                      |
| 0.05                       | 0.010         | 0.50                    | 0.10                       | 0.02          | 400                 | 38                      | 10                      |
| 0.05                       | 0.015         | 0.50                    | 0.10                       | 0.03          | 400                 | 38                      | 10                      |
| 0.05                       | 0.030         | 0.50                    | 0.10                       | 0.06          | 400                 | 38                      | 10                      |
| 0.05                       | 0.045         | 0.50                    | 0.10                       | 0.09          | 400                 | 38                      | 10                      |
| 0.05                       | 0.135         | 0.50                    | 0.10                       | 0.27          | 400                 | 38                      | 7, 10, 30, 60           |
| 0.05                       | 0.27          | 0.50                    | 0.10                       | 0.54          | 400                 | 38                      | 10                      |
| 0.05                       | 0.80          | 0.50                    | 0.10                       | 1.6           | 400                 | 38                      | 10                      |
| 0.06                       | 0.16          | 0.59                    | 0.10                       | 0.27          | 380                 | 38                      | 10                      |
| 0.06                       | 0.16          | 0.40                    | 0.15                       | 0.39          | 380                 | 24                      | 10                      |
| 0.06                       | 0.16          | 0.20                    | 0.29                       | 0.79          | 380                 | 23                      | 10                      |
| 0.06                       | 0.16          | 0.10                    | 0.58                       | 1.6           | 380                 | 18                      | 10                      |
| 0.06                       | 0.16          | 0.05                    | 1.2                        | 3.2           | 380                 | 12                      | 10                      |
| 0.06                       | 0.16          | 0.02                    | 2.9                        | 7.9           | 380                 | 5.5                     | 10                      |
| 0.06                       | 0.16          | 0.002                   | 29                         | 79            | 380                 | 0.6                     | 10                      |
| 0.08                       | 0.00          | 0.76                    | 0.10                       | 0             | 300                 | 38                      | 10, 60                  |
| 0.08                       | 0.21          | 0.76                    | 0.10                       | 0.27          | 300                 | 38                      | 7, 10, 30, 60           |
| 0.07                       | 0.00          | 0.69                    | 0.10                       | 0             | 340                 | 38                      | 10, 60                  |
| 0.07                       | 0.19          | 0.69                    | 0.10                       | 0.27          | 340                 | 38                      | 7, 10, 30, 60           |

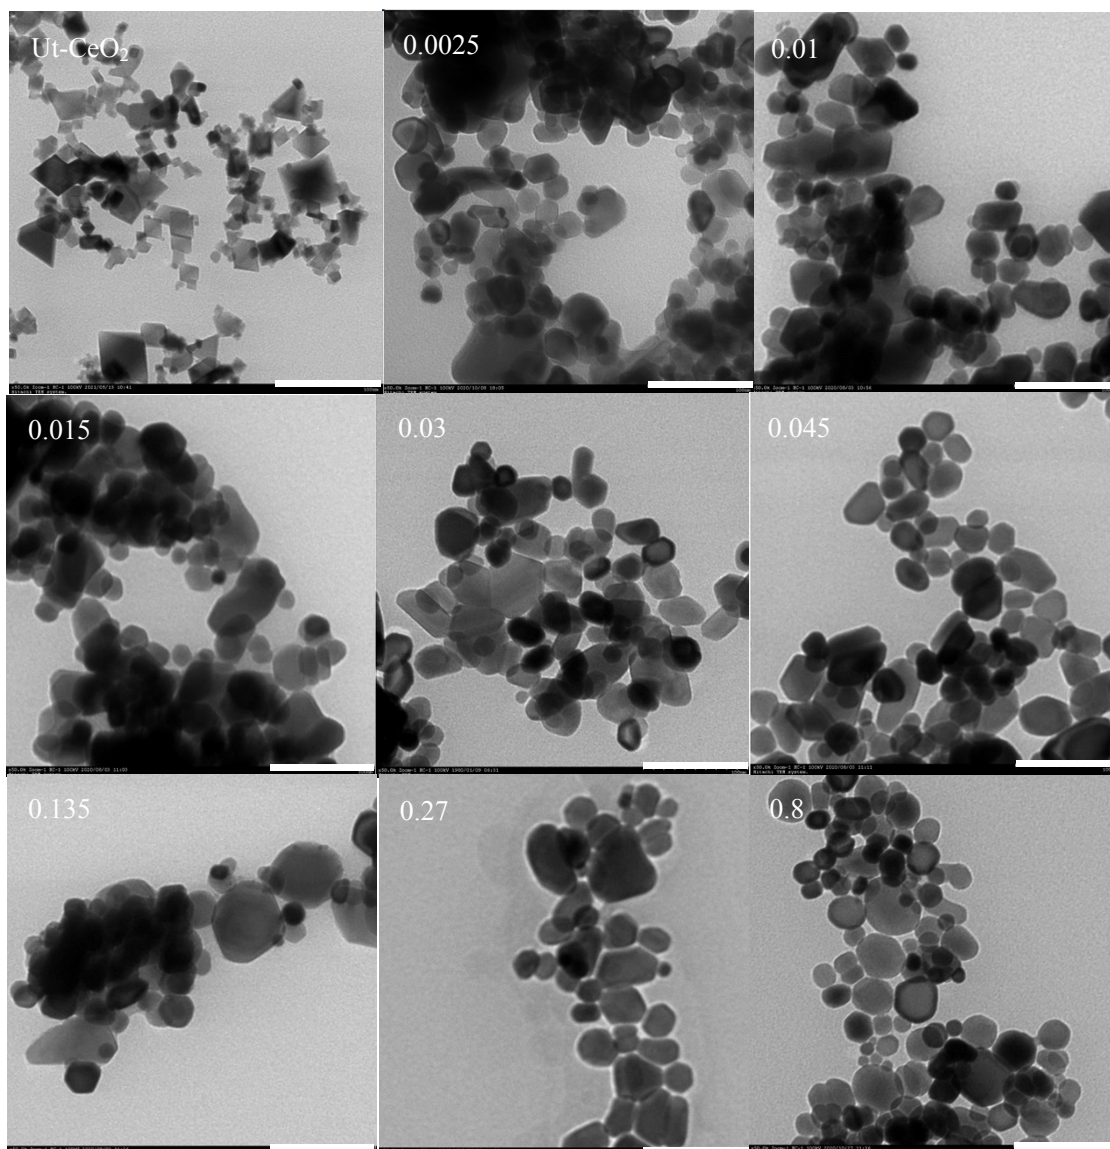

Figure S1. TEM images of the products. Untreated  $\text{CeO}_2$  (Ut- $\text{CeO}_2$ ), 0.0025, 0.01, 0.015, 0.03, 0.045, 0.135, 0.27, and 0.8 mol/L DA concentrations. 0.05 mol/L  $\text{CeO}_2$ , 400 °C, 38 MPa, and 0.5 kg/L water density for 10 min. Scale bars represent 100 nm.

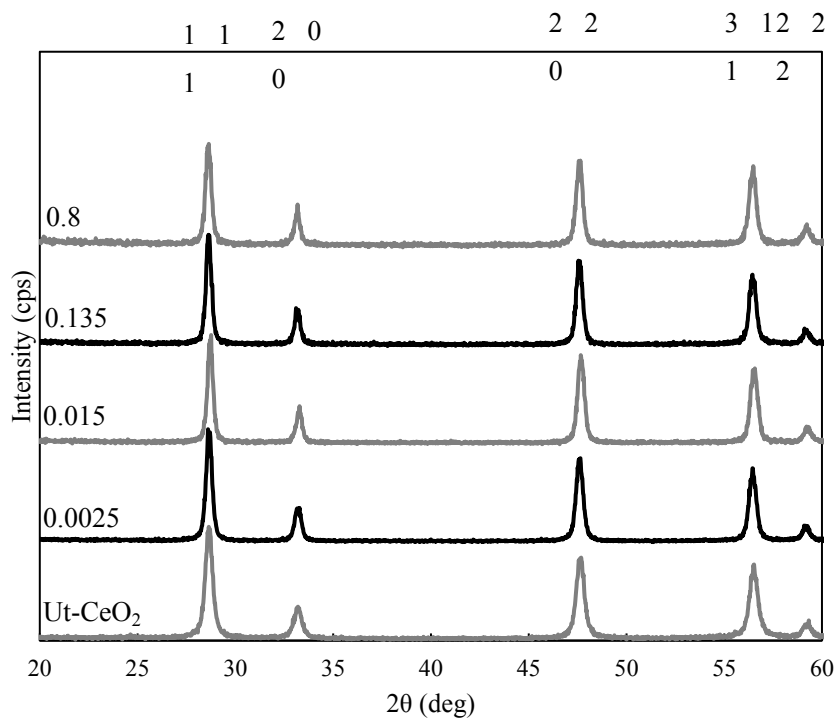

Figure S2. XRD patterns of the products. Untreated  $\text{CeO}_2$  (Ut- $\text{CeO}_2$ ), 0.0025, 0.015, 0.135 and 0.8 mol/L DA concentration in water. 0.05 mol/L  $\text{CeO}_2$ , 400 °C, and 0.5 kg/L water density for 10 min.

Table S2. Atomic compositions (%) of cerium (III) decanoate and extracted chemicals.

| Samples                | C 1s | O 1s | Ce 3d |
|------------------------|------|------|-------|
| Cerium (III) decanoate | 80.8 | 16.0 | 3.2   |
| Extracted chemicals    | 80.9 | 16.1 | 3.0   |

Table S3. Oxygen storage capacity (OSC  $\mu\text{mol-O/g}$ , 500 °C) of  $\text{CeO}_2$ .

| Untreated | 340 °C 7 min | 340 °C 360 min |
|-----------|--------------|----------------|
| 38        | 67           | 91             |

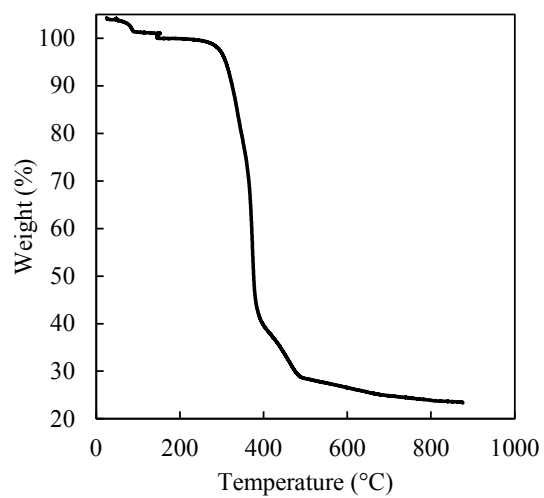

Figure S3. TGA curve of the Ce (III) decanoate synthesized by metathesis reaction.
